# Supplementary material for: Long noncoding RNA Gm31629 protects against mucosal damage in experimental colitis via YB-1/E2F pathway
Source: PubMed Central journal article supplement (PMC8986069; doi:10.1172/jci.insight.150091), 2022-03-22
Supplement: jciinsight-7-150091-s181.pdf [file jciinsight-7-150091-s181.pdf]

1 Supplementary Table 1

2 Nucleotide sequences of primers used for qRT-PCR

|         |                            |
|---------|----------------------------|
| Mouse   | F: GATCATTGCTCCTCCTGAGC    |
| Actin   | R: ACTCCTGCTTGCTGATCCAC    |
| mouse   | F: CTAAGCGAACTCGGGAGC      |
| Gm31629 | R: CACAGCAGGATTGATGGATG    |
| Human   | F: CGTGGACATCCGCAAAGAC     |
| Actin   | R: TCGTCATACTCCTGCTTGCTG   |
| Human   | F: GGAGTCCAGAAGGCGGTAGT    |
| Gm31629 | R: CTGAAAGTAGGTGCCGAGGA    |
| Mouse   | F: CCCTCACACTCAGATCATCTTCT |
| Tnf     | R: GCTACGACGTGGGCTACAG     |
| Mouse   | F: GCAACTGTTCTGAACTCAACT   |
| Il1b    | R: ATCTTTTGGGGTCCGTCAACT   |
| Mouse   | F: CAGACCGTAACCATTATAGACGC |
| Yb-1    | R: ATCCCTCGTTCTTTTCCCCAC   |
| Mouse   | F: TGCAGAAACGGCGCATCTAT    |
| E2f1    | R: CCGCTTACCAATCCCCACC     |
| Mouse   | F: ACGGCGCAACCTACAAAGAG    |
| E2f2    | R: GTCTGCGTGTAAGCGAAGT     |

|       |                            |
|-------|----------------------------|
|       |                            |
| Mouse | F: ACTCAGGGCCTATCCATGTG    |
| E2f5  | R: CTCAGGCAGGTTTTGAGCAG    |
| Mouse | F: GCGTACCCTGACACCAATCTC   |
| Ccnd1 | R: CTCCTCTTCGCACTTCTGCTC   |
| Mouse | F: AGAAGGTACTTACGGTGTGGT   |
| Cdk1  | R: GAGAGATTTCCCGAATTGCAGT  |
| Mouse | F: TGGCATCATACAAGTTTGTGTGG |
| Cdc6  | R: CAGGCTGGACGTTTCTAAGTTTT |
| Mouse | F: CAACTGGAACATATACTGCTCCG |
| Top2a | R: GGGTCCCTTTGTTTGTATCAGC  |
| Mouse | F: ATCCACCACCGCTTCAAGAAC   |
| Mcm2  | R: TACCACCAAACCTCTCACGGTT  |
| Mouse | F: CCTACTCGAAGACTTACCCAGT  |
| Lgr5  | R: GCATTGGGGTGAATGATAGCA   |
| Mouse | F: AAGCACACCTTGACTGGTACG   |
| Ascl2 | R: AAGTGGACGTTTGCACCTTCA   |

3 (F, forward primer; R, reverse primer.)

4

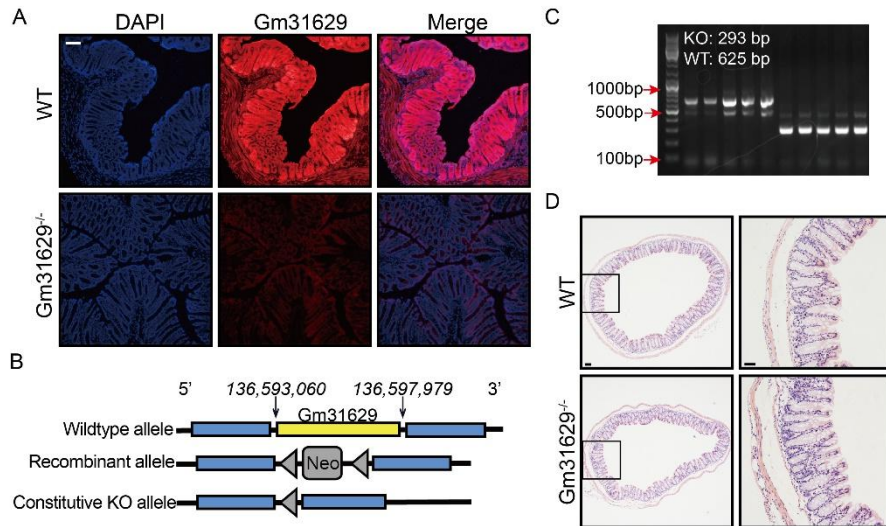

5

6 Supplementary Figure 1. Construction of Gm31629 knockout mouse

7 (A) Representative fluorescence in situ hybridization image of Gm31629 (Red) in

8 Gm31629<sup>-/-</sup> mice and WT mice (Scale Bar 100μm). (B) Scheme of the mouse

9 Gm31629 knockout construct. (C) PCR image of genotyping data of Gm31629<sup>-/-</sup> mice

10 and WT mice. (D) H&E stained sections of colon tissues (Scale Bar 100μm)

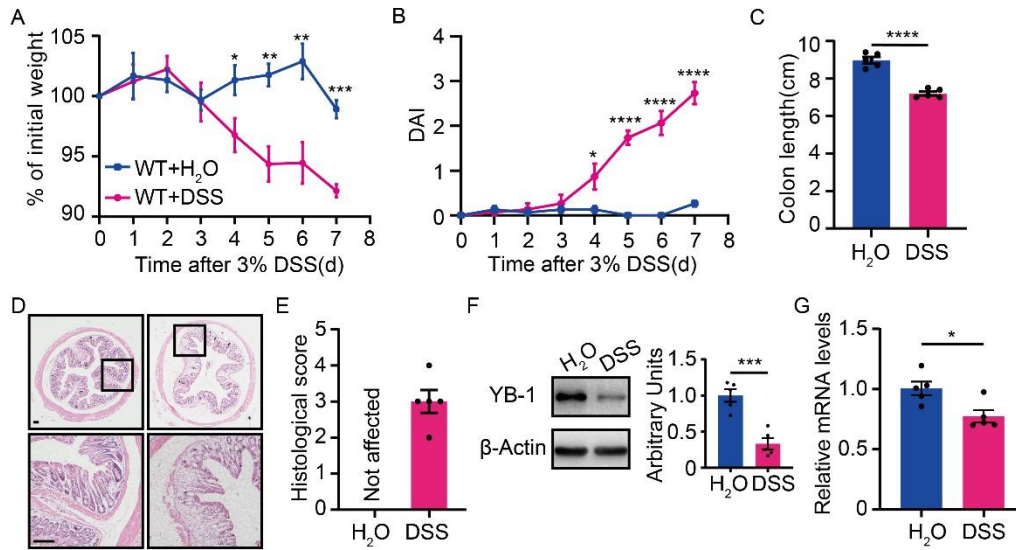

11

12 Supplementary Figure 2. Intestinal YB-1 decreases in response to inflammatory  
 13 stimuli

14 (A-E) Eight-week-old WT mice were subjected to 3%DSS in drinking water or tap  
 15 water for 7 days and sacrificed on day 8 (n=5). (A) Body weight changes of mice. (B)  
 16 Disease activity index (DAI) of mice during indicated period. (C) Measurement of  
 17 colon length. (D) H&E stained sections of colon tissues (Scale Bar 100µm) (E)  
 18 Quantification of histological score from colonic sections in panel D (F) The protein  
 19 level of YB-1 in colon tissues. (G) qRT-PCR analysis of *Yb-1* in colon tissues. All data  
 20 were represented as mean ± SEM. For comparisons of two groups, a two-tailed  
 21 Student's t test was performed.
